# Supplementary material
Source: publisher figshare collection journal article supplement (https://acs.figshare.com/ndownloader/files/24603194)
Supplement: Supplementary file 1 [file 24603194]

## Supporting Information

for

Surface-Confined Metal-Organic Precursors Comprising Naphthalene-Like Derivatives with Differently Distributed Halogen Substituents: A Monte Carlo Model

Jakub Lisiecki and Paweł Szabelski\*

*Department of Theoretical Chemistry, Institute of Chemical Sciences, Faculty of Chemistry,  
Maria Curie-Skłodowska University in Lublin,  
Pl. M.C. Skłodowskiej 3, 20-031 Lublin, Poland*

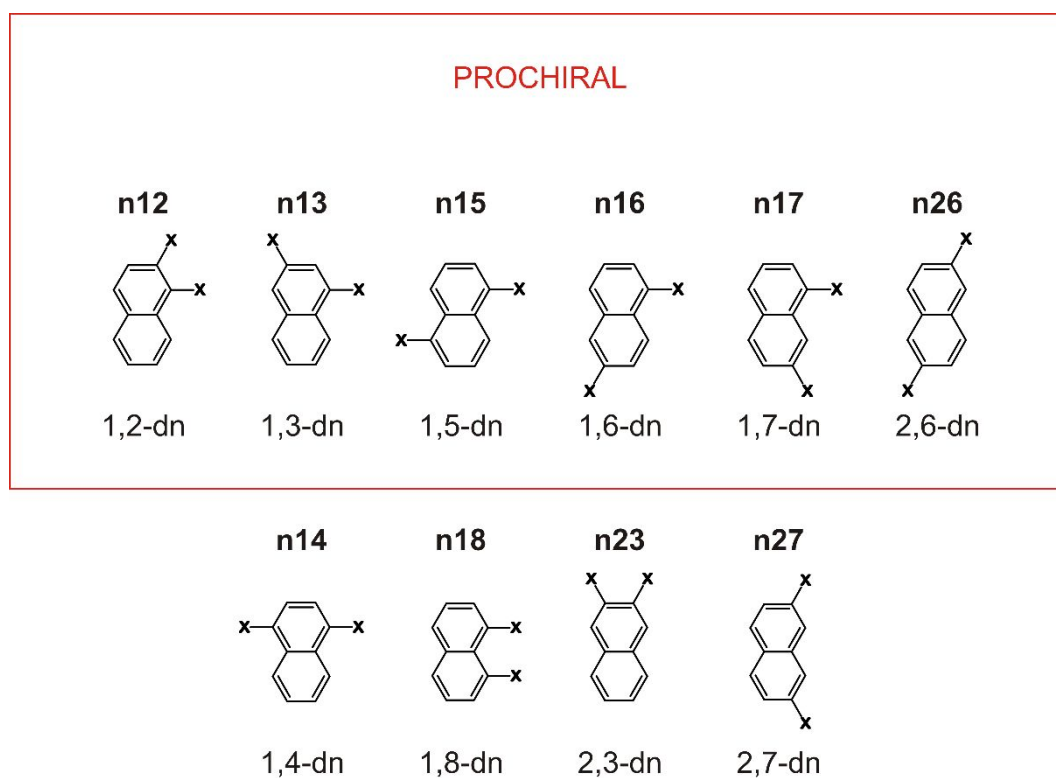

dn = disubstituted naphthalene

**Figure S1.** Ten possible disubstituted isomers of naphthalene. The prochiral molecules, able to adopt mirror-image configurations when adsorbed, are grouped inside the red frame.

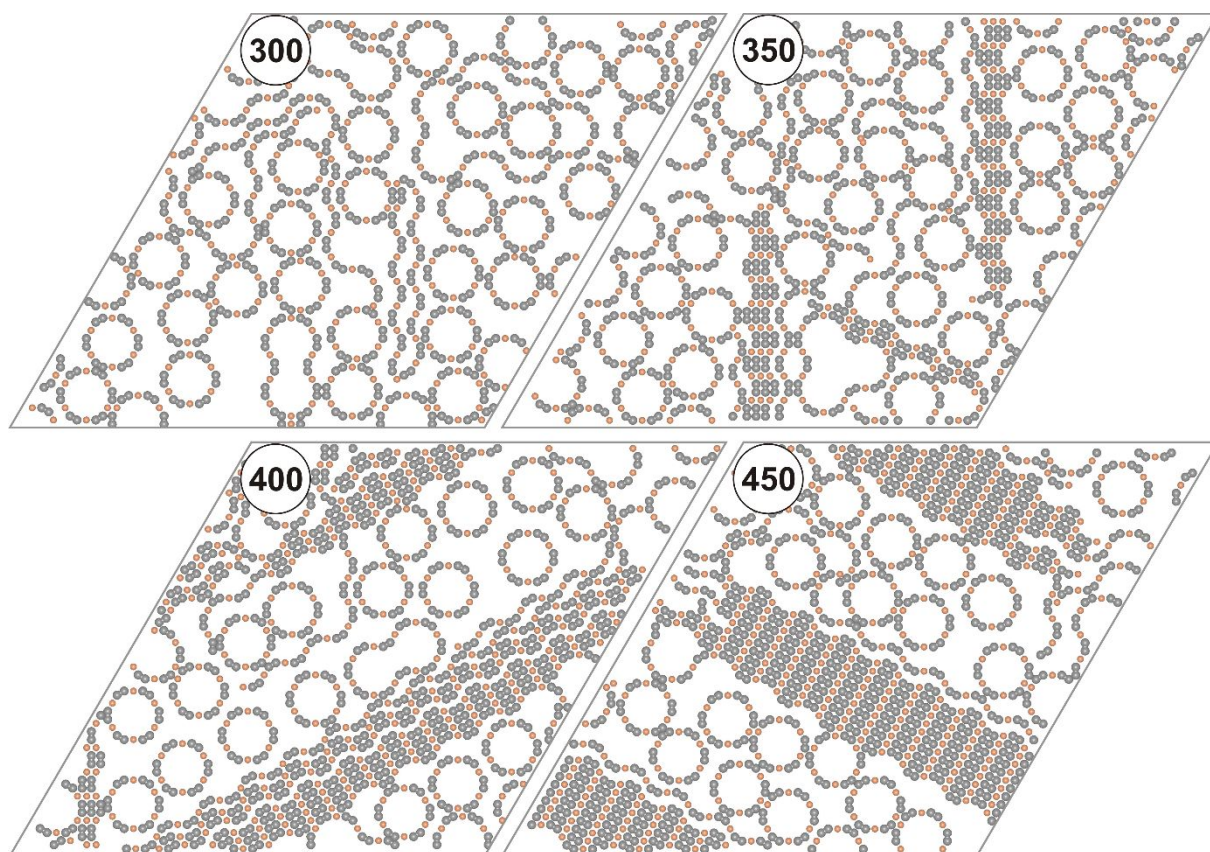

**Figure S2.** Effect of surface coverage on the morphology of the adsorbed overlayers comprising the disubstituted isomer **n27**. For each snapshot, the number of molecules used in the simulations is shown inside the white circle (normal cooling,  $T = 0.01$ ,  $\theta_{300} = 0.09$ ,  $\theta_{350} = 0.105$ ,  $\theta_{400} = 0.12$ ,  $\theta_{450} = 0.135$ ,  $L = 100$ ).

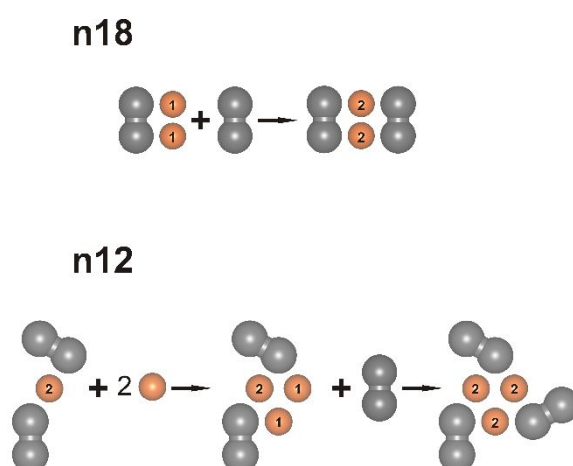

**Figure S3.** Schematic representation of the most efficient routes to complete metal coordination corresponding to the disubstituted naphthalene derivatives **n18** (top) and **n12** (bottom). For each metal atom its current coordination number is additionally shown.

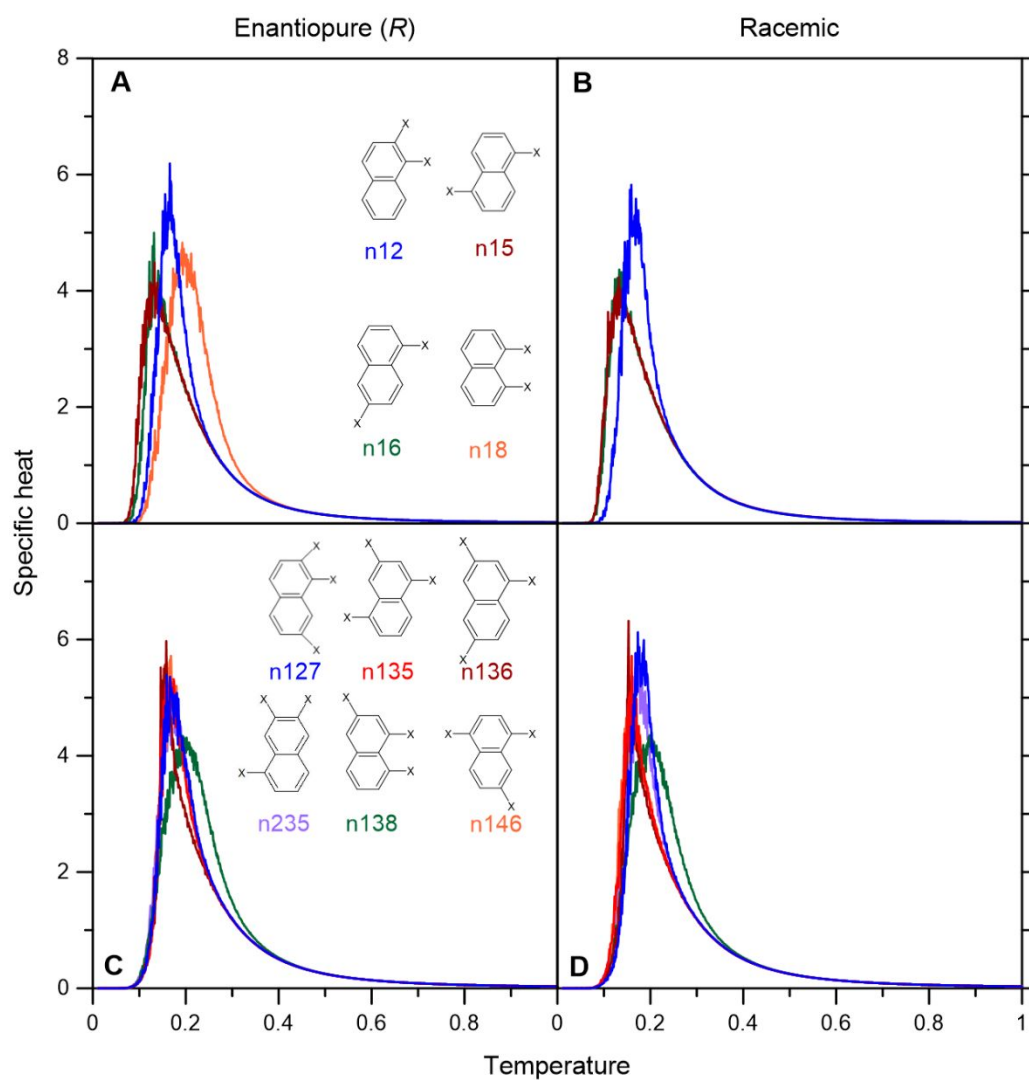

**Figure S4.** Specific heat curves calculated for the enantiopure (left) and racemic systems (right) comprising differently disubstituted (A,B) and trisubstituted prochiral isomers of **n**.  $L = 200$ ,  $N_l = 400$ ,  $N_m = 400$  (for A and B) and 600 (for C and D),  $\theta = 0.03$  (A, B) and 0.035 (C, D).

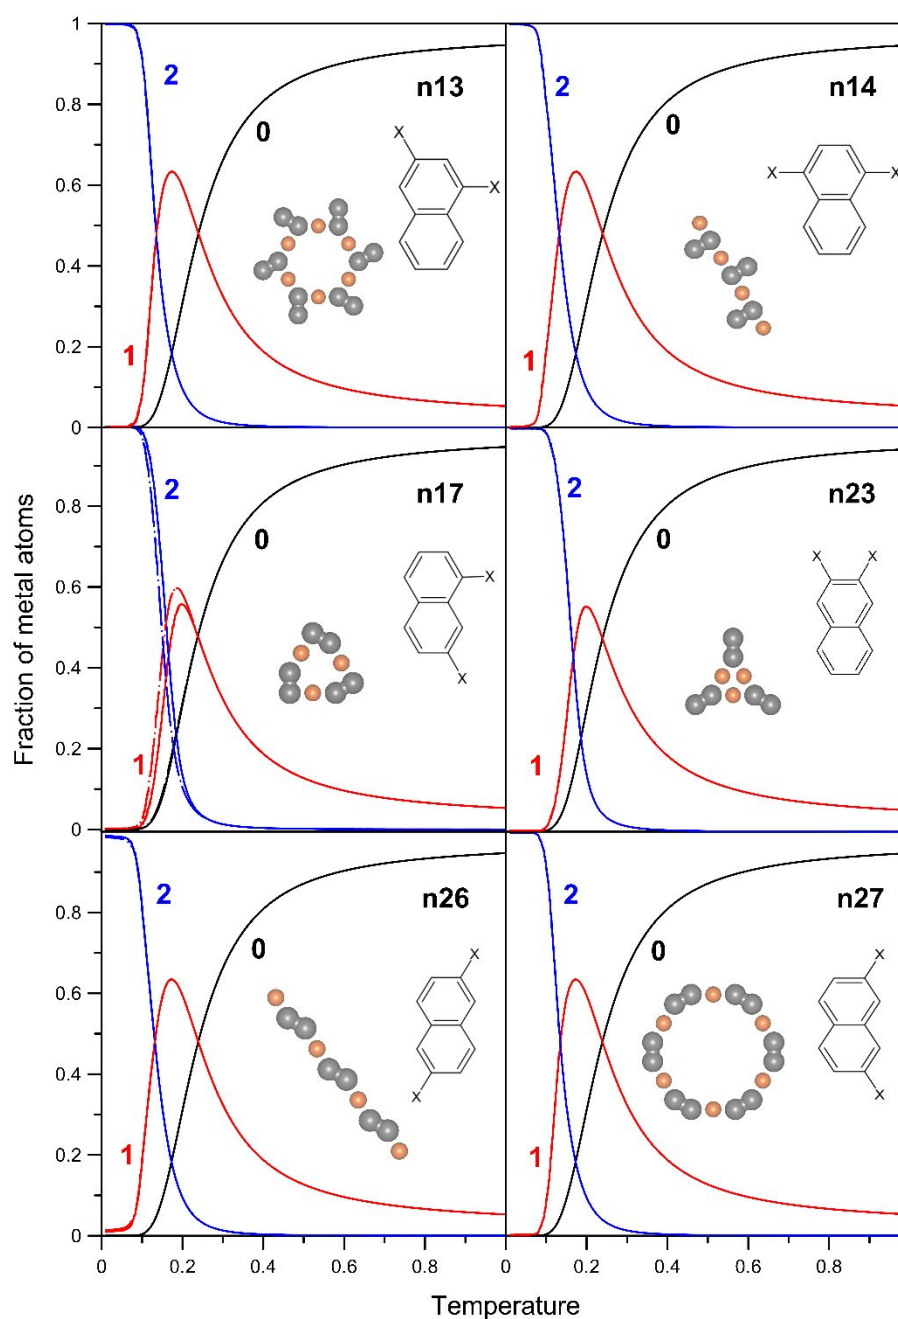

**Figure S5.** Fraction of metal atoms linked with zero (black), one (red) and two (blue) molecules of **n** (*R* if chiral) as a function of temperature, simulated for the one-monomer type systems. For the prochiral molecules **n13**, **n17** the dashed lines are the results predicted for the corresponding racemic overlays. Characteristic structural motifs formed in these one-monomer type assemblies are shown in each panel. 400 molecules mixed with 400 metal atoms,  $L = 200$ .

n12

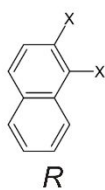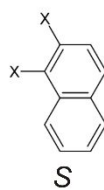

*homochiral*

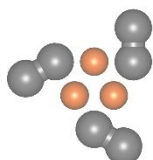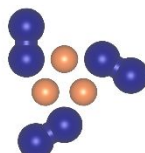

*heterochiral*

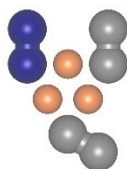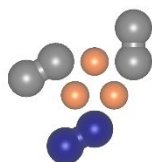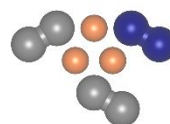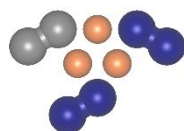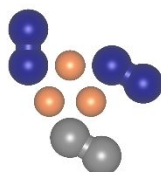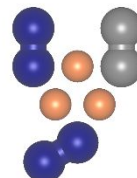

**Figure S6.** Possible trimeric metalorganic configurations differing in the number of the enantiomers *R* and *S* of the prochiral tecton n12.

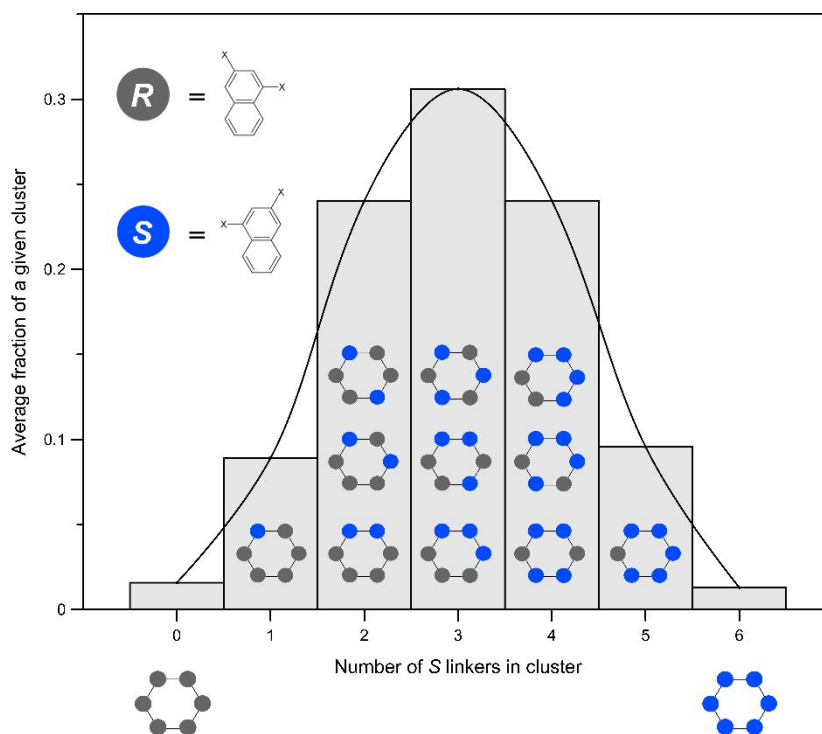

**Figure S7.** Fraction of hexagonal clusters comprising a given number of the *S*-enantiomer simulated for the racemic overlayer comprising 400 molecules of **n13** and 400 metal atoms. The black solid line is a spline showing normal envelope of the histogram.  $L = 200$ ,  $\theta = 0.03$ .

## PROCHIRAL

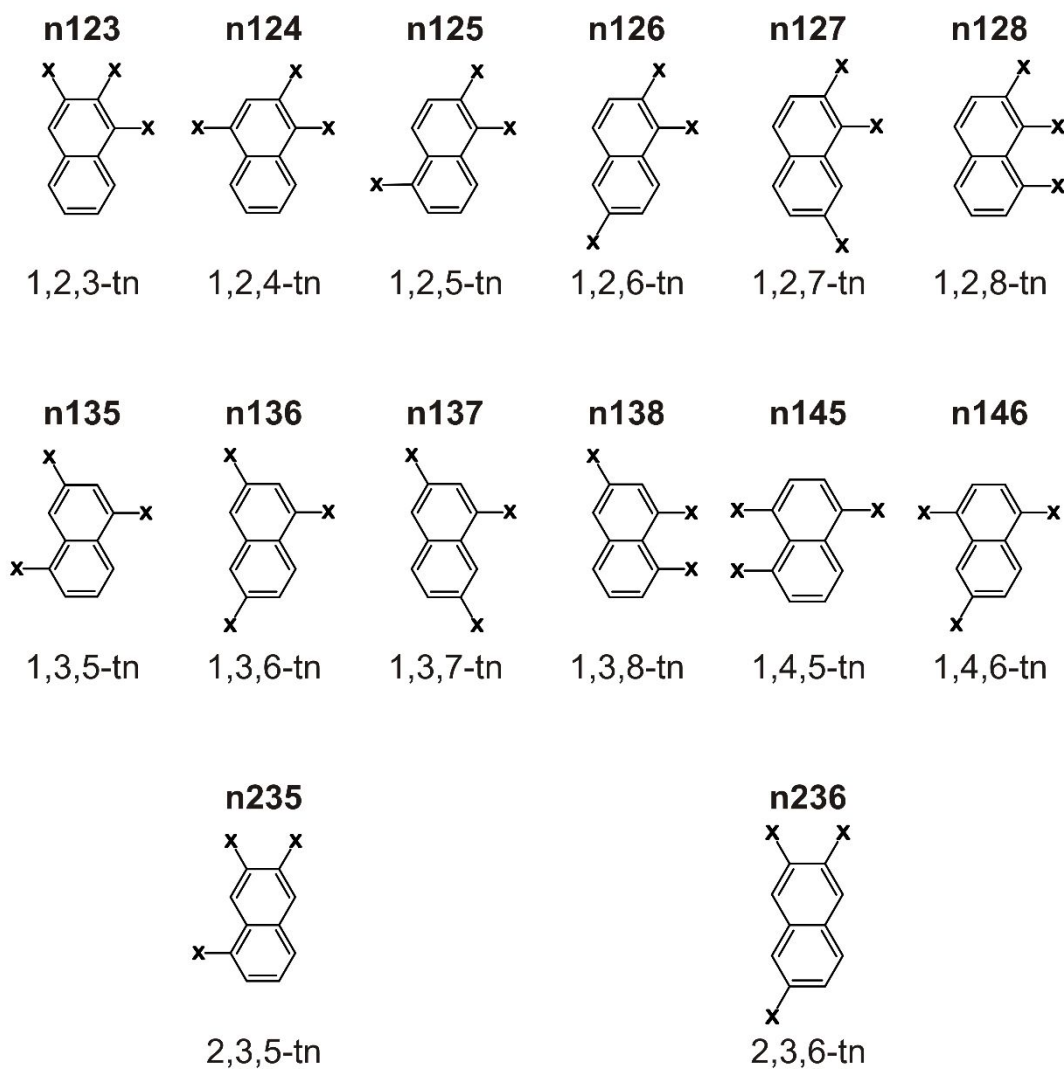

tn = trisubstituted naphthalene

**Figure S8.** Fourteen trisubstituted isomers of naphthalene. The prochiral molecules, able to adopt mirror-image configurations when adsorbed, are grouped inside the red frame.



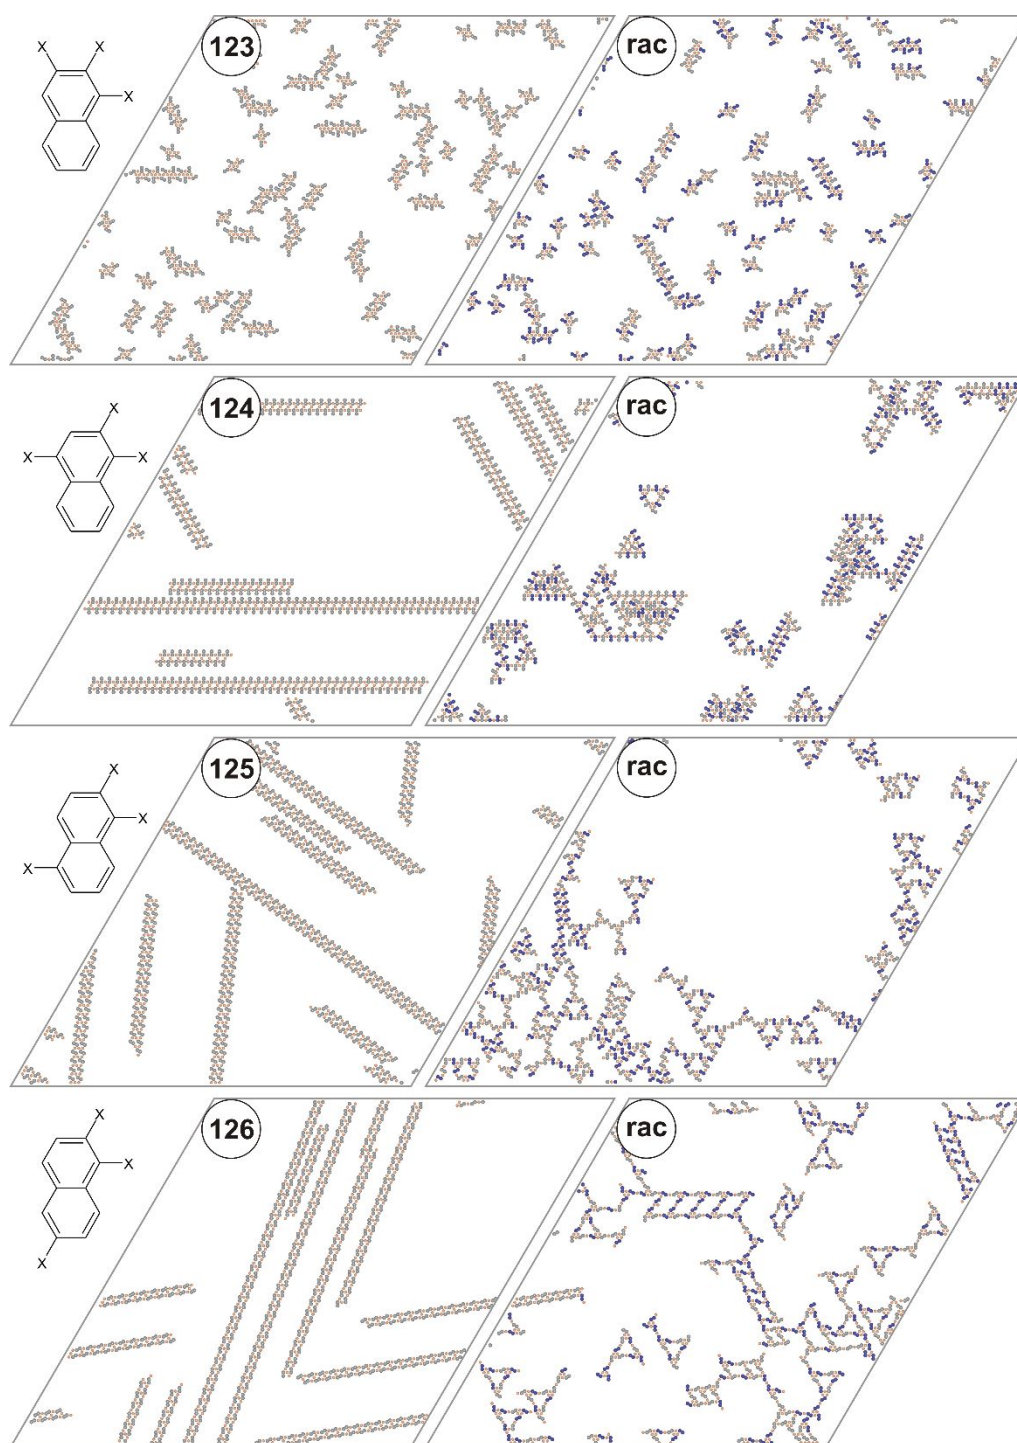

**Figure S9.** Adsorbed structures formed in the enantiopure (*R*, left) and racemic (right) overlays comprising 400 molecules of differently trihalogenated naphthalene isomers mixed with 600 metal atoms; the encircled digits denote positions of halogen substituents in the corresponding molecule;  $L = 200$ ,  $\theta = 0.035$ .



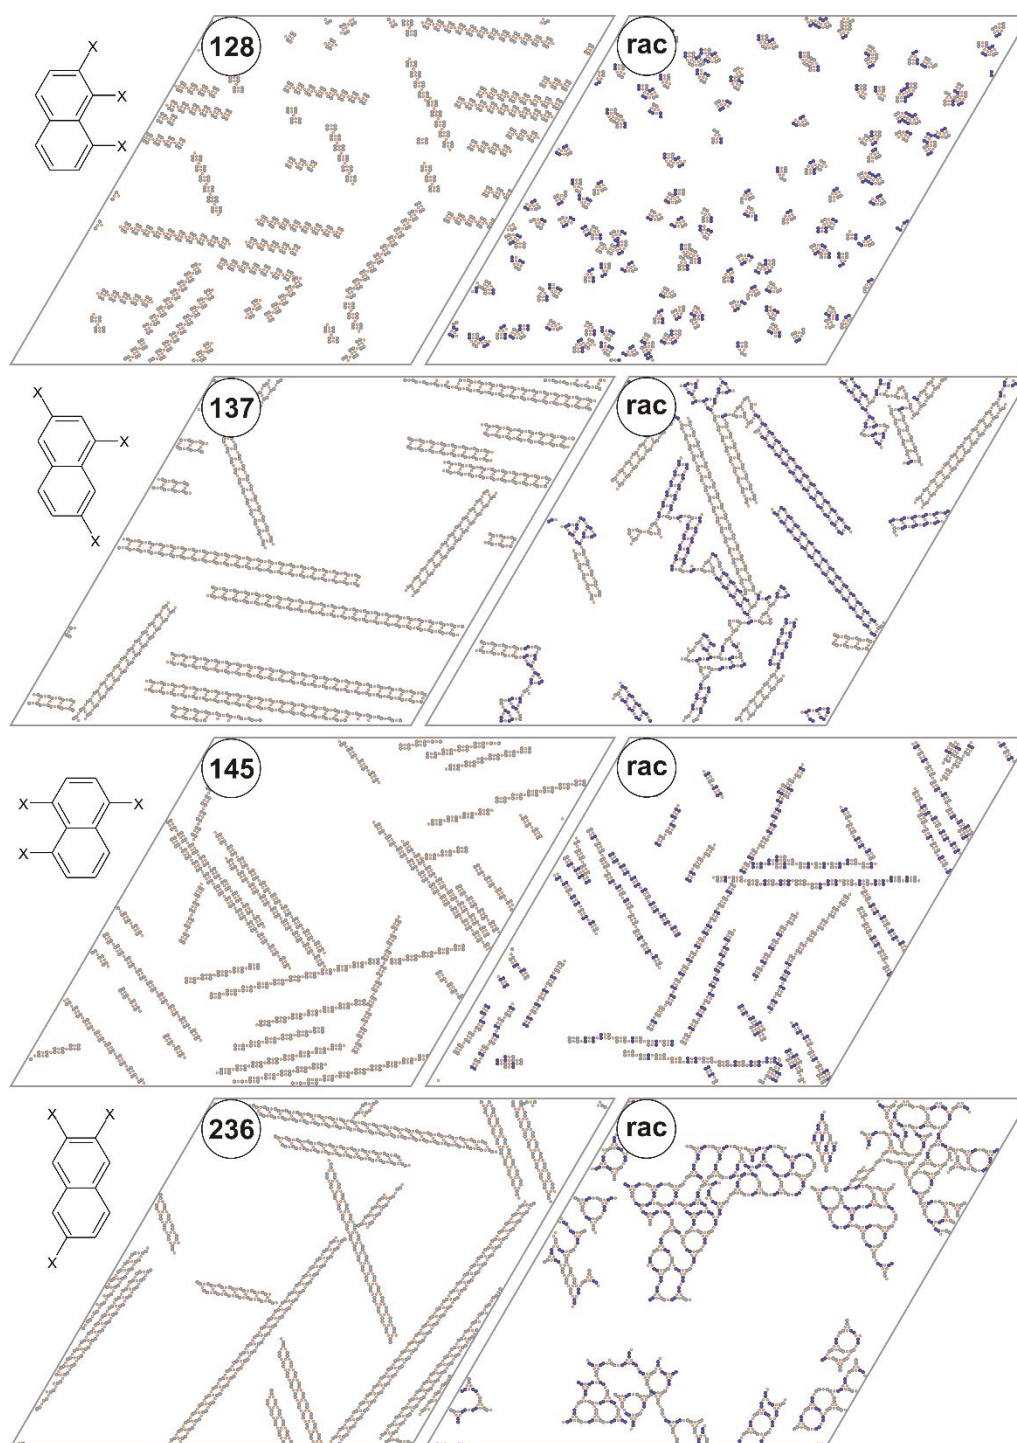

**Figure S10.** Adsorbed structures formed in the enantiopure (*R*, left) and racemic (right) overlays comprising 400 molecules of differently trihalogenated naphthalene isomers mixed with 600 metal atoms; the encircled digits denote positions of halogen substituents in the corresponding molecule;  $L = 200$ ,  $\theta = 0.035$ .

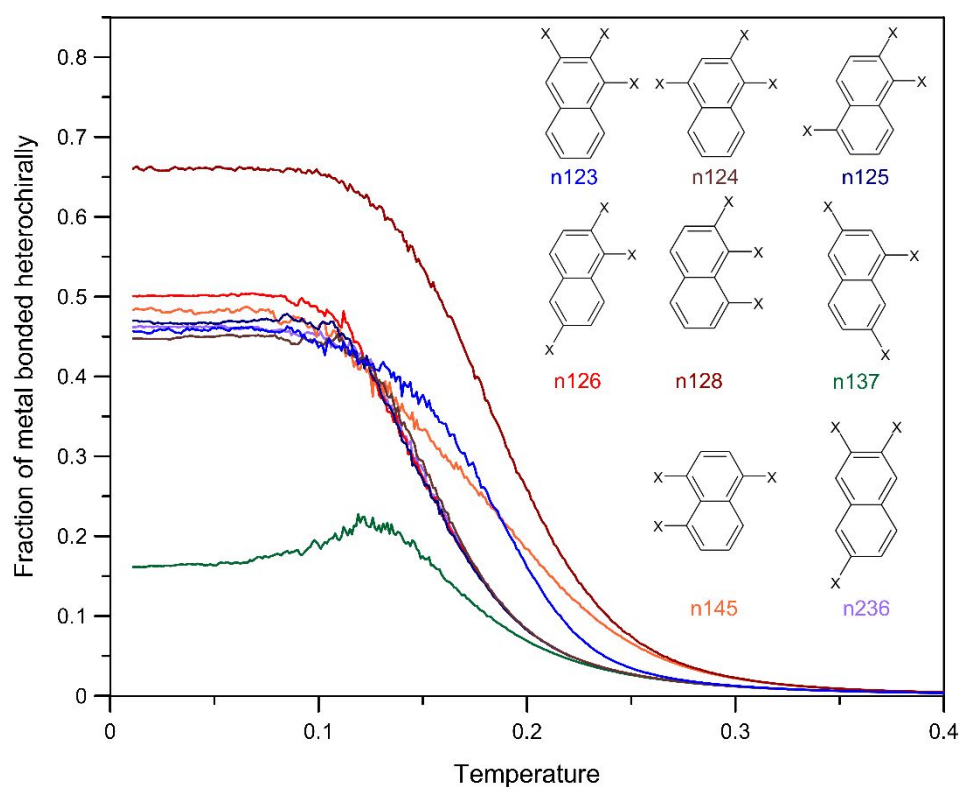

**Figure S11.** Influence of temperature on the fraction of metal nodes linked with the opposite enantiomers (*R* and *S*) calculated for the remaining trisubstituted isomers of **n**.  $L = 200$ ,  $N_l = 400$ ,  $N_m = 600$ ,  $\theta = 0.035$ .

### Calculation of the radial distribution function

The metal-metal radial distribution function was calculated using the following formula:

$$g(r) = \langle n_r \rangle A / 2\pi r dr N_m$$

where  $\langle n_r \rangle$  is the average number of metal atoms in  $(r, r + dr)$  shell away from any given metal,  $2\pi r dr$  is the area of considered shell ( $dr = 0.2$ ) and  $A$  denotes the Cartesian area of the system ( $A = L^2 * \sqrt{3}/2$ ).
